# Supplementary material
Source: MDPI journal article supplement (https://www.mdpi.com/2072-4292/12/21/3579)
Supplement: s1 [file s1]

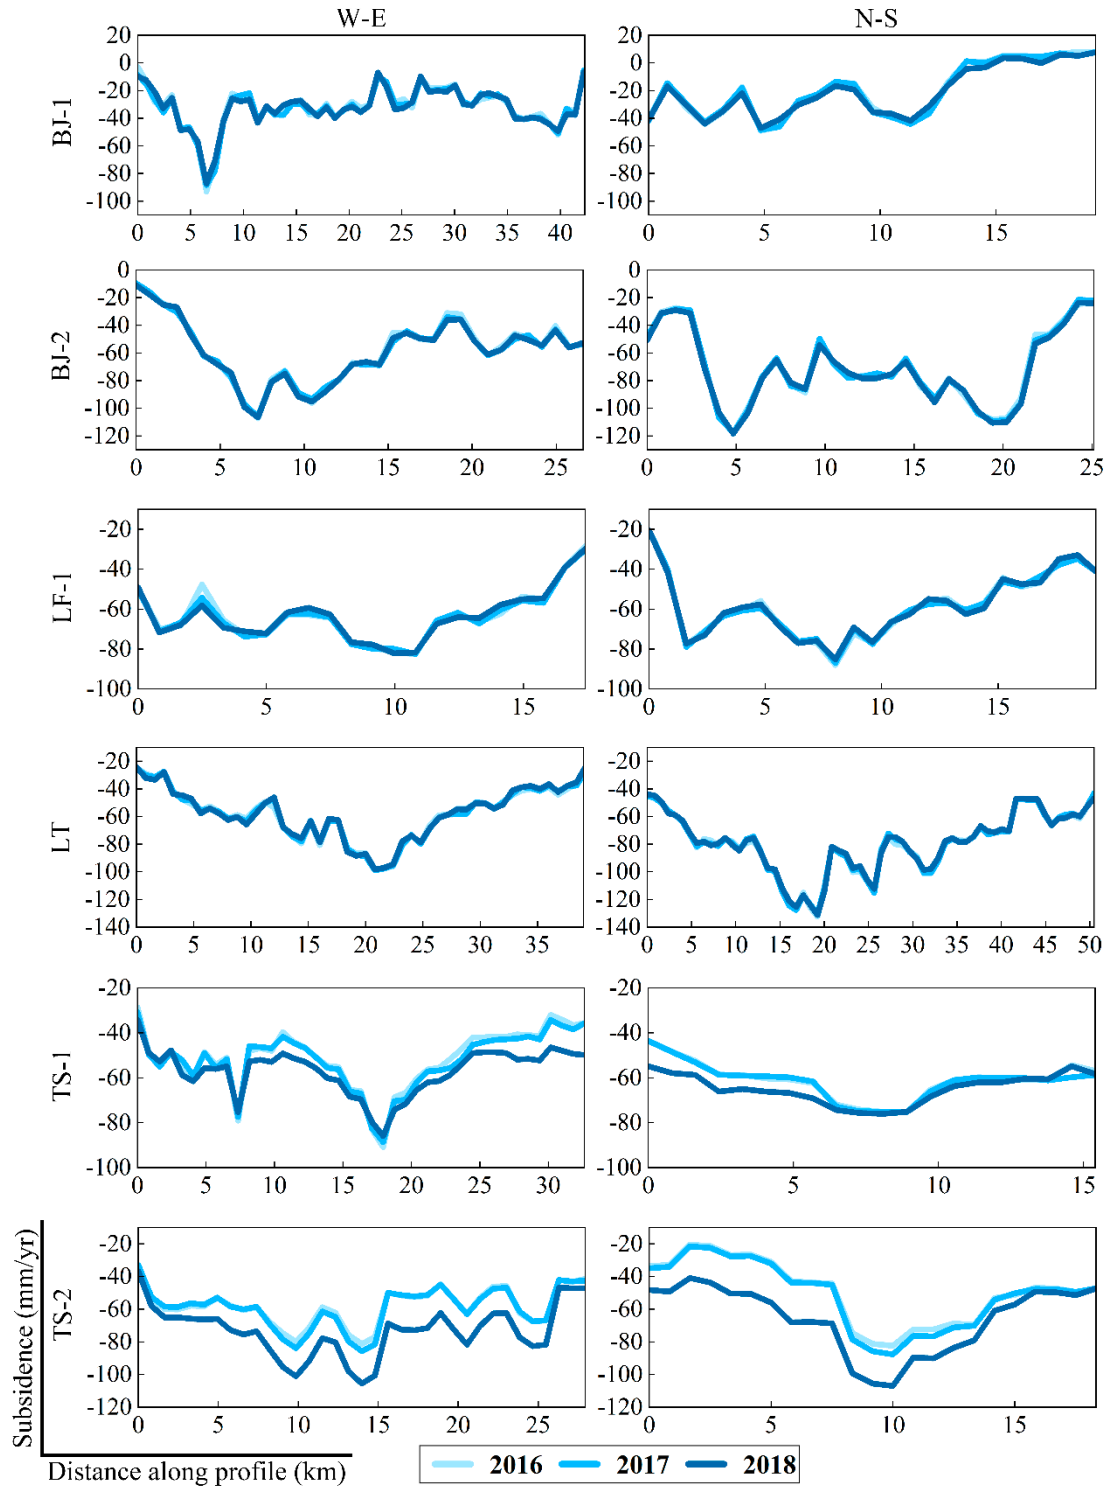

**Figure S1.** Profiles of the InSAR vertical displacement (2016-2018) marked by the black dashed lines in Figure 5.

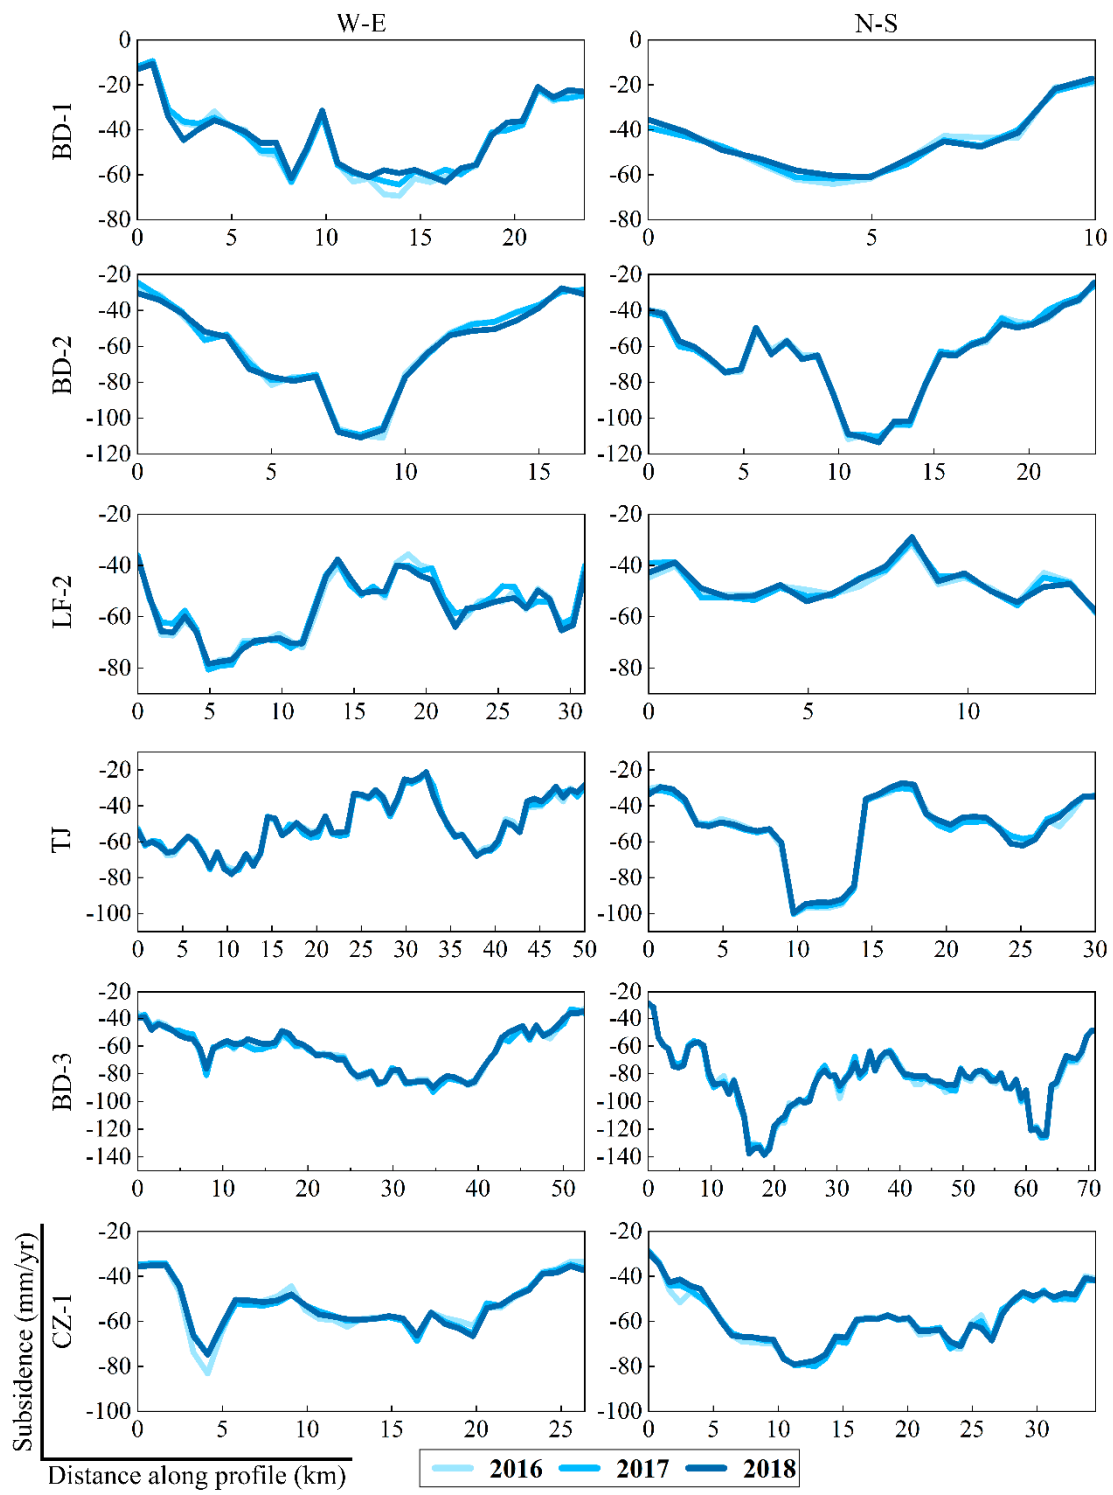

**Figure S2.** (continued)

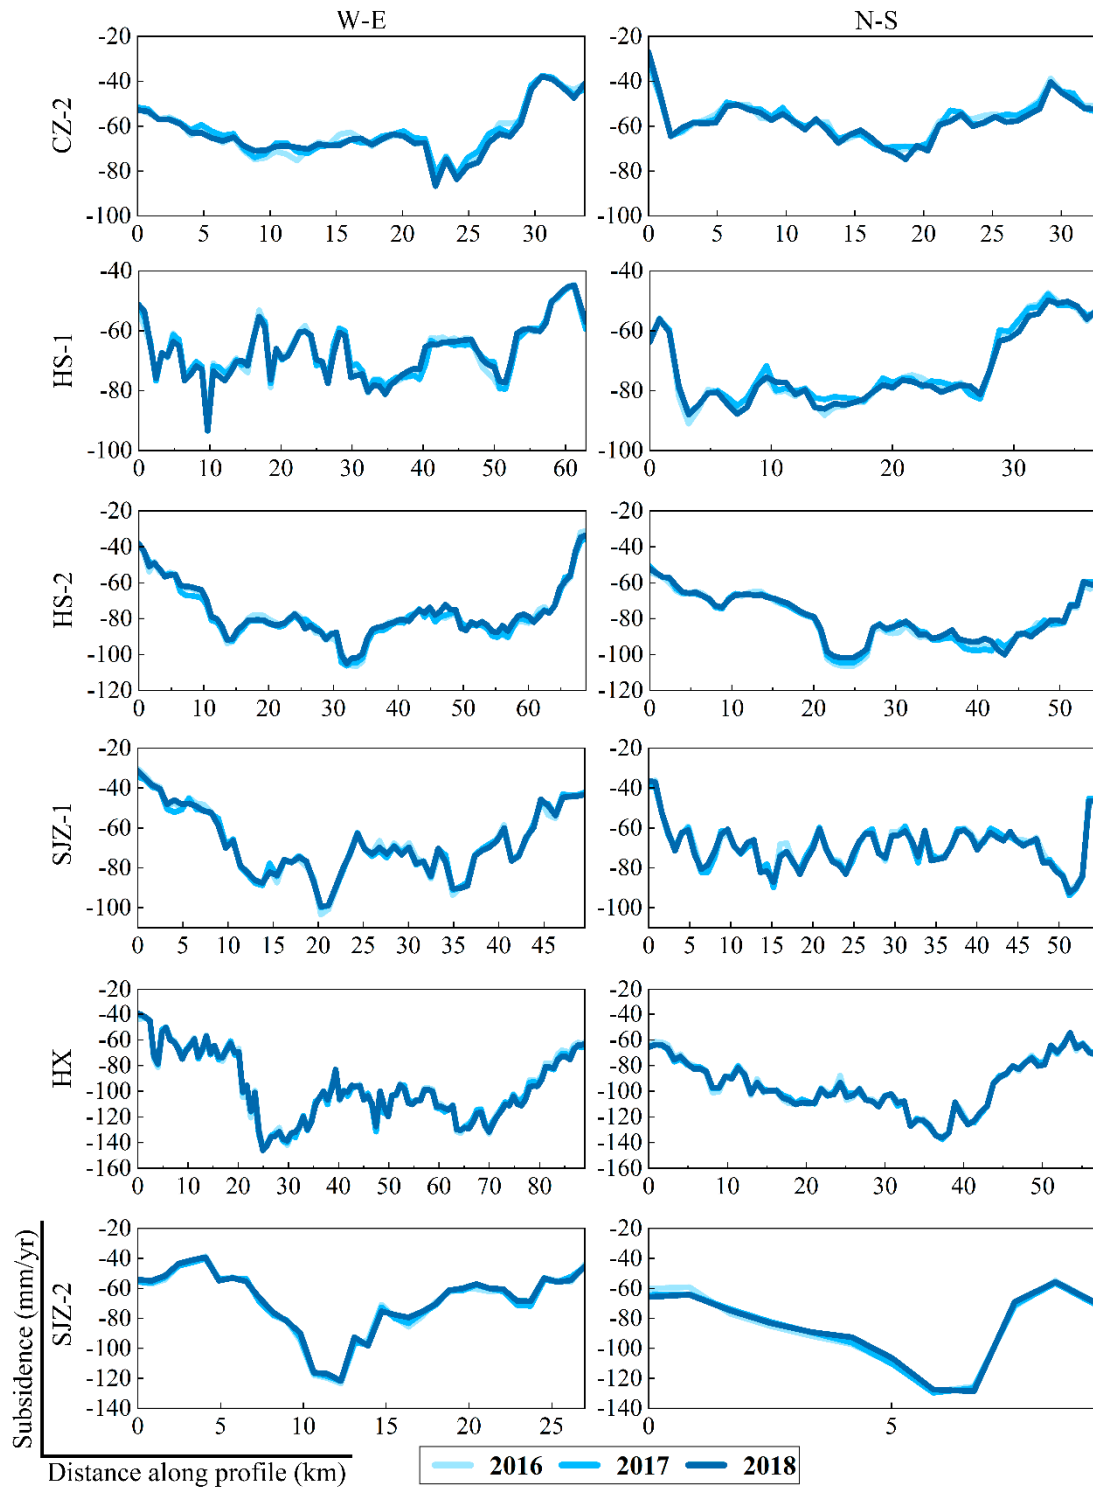

Figure S3. (continued)

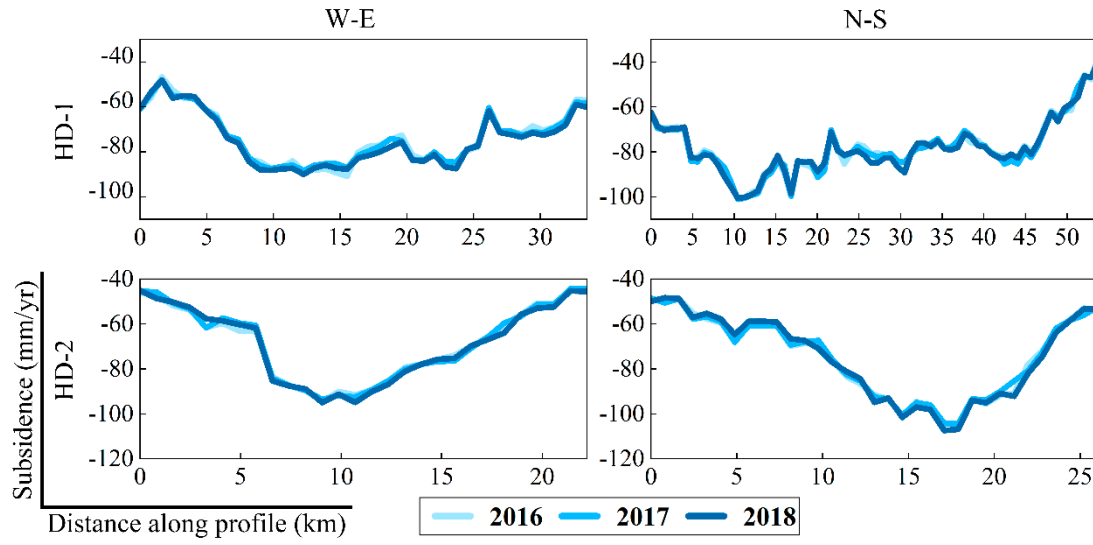

**Figure S4.** (continued)

**Table S1.** Incidence angle for the Sentinel-1A datasets used in this study.

| Track<br>No. | Incidence angle (°) |           |           |
|--------------|---------------------|-----------|-----------|
|              | Subwath 1           | Subwath 2 | Subwath 3 |
| 40           | 33.65               | 39.08     | 43.75     |
| 142          | 33.72               | 39.09     | 43.77     |
| 69           | 33.67               | 39.11     | 43.76     |
